# Supplementary material
Source: PubMed Central journal article supplement (PMC4376569)

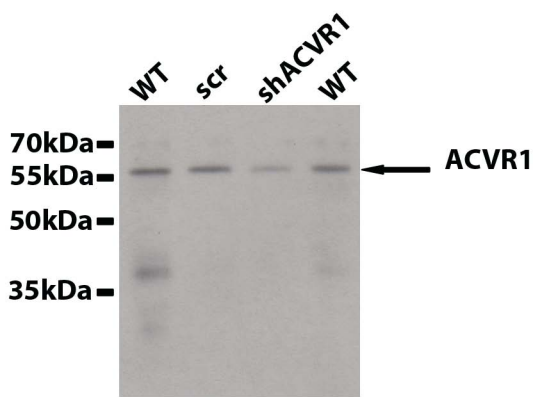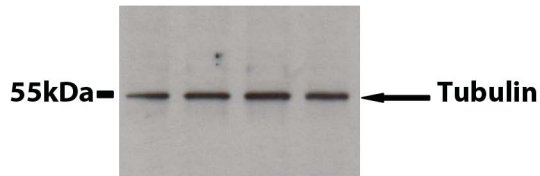

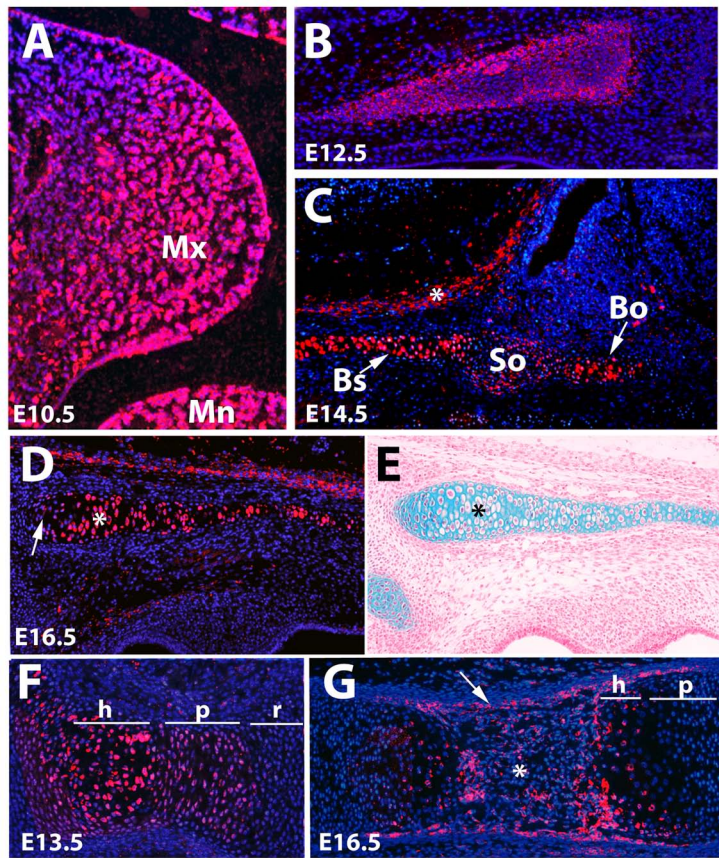

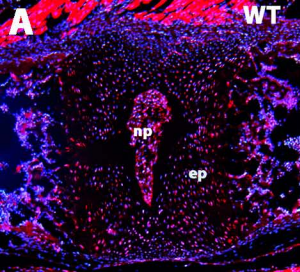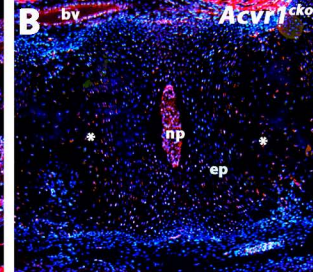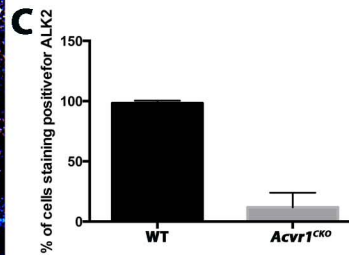

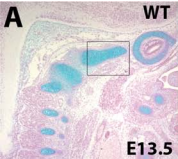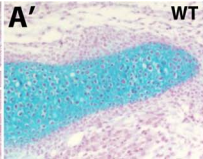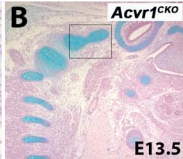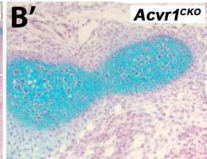

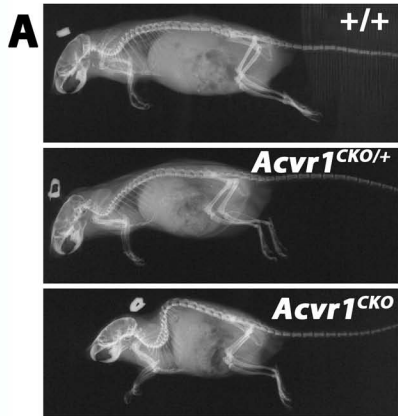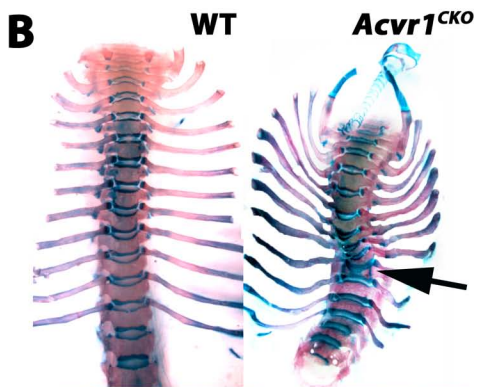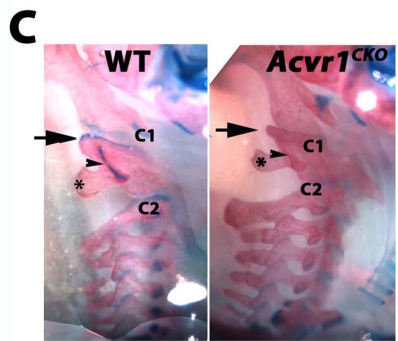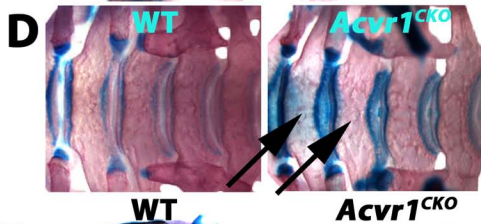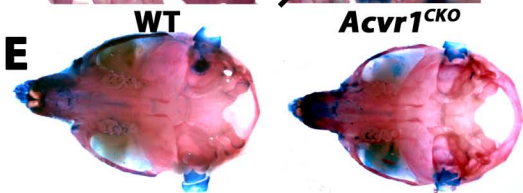

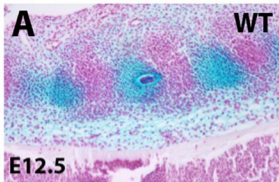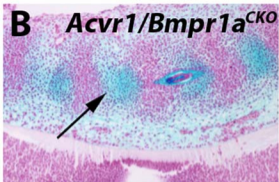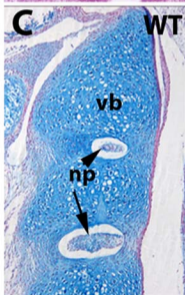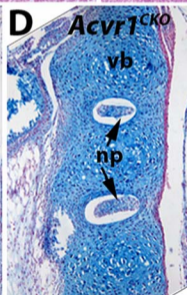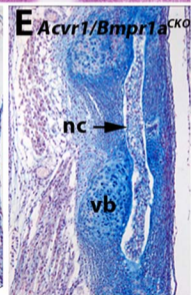

Supplement: NIHMS637739-supplement-Supp_FigureS1-S6.pdf [file NIHMS637739-supplement-Supp_FigureS1-S6.pdf]
